# Supplementary material
Source: HighWire-hosted journal article supplement (doi:10.1101/rna.080142.124)
Supplement: Supplemental_Figure_Legends.docx [file Supplemental_Figure_Legends.docx]

**Figure S1: Cartoon model of PRP40 domains in the context of the yeast E complex.** CryoEM structure of the E complex, modeled after Li *et al.* 2019. PRP40 (in blue, with orange WW and FF domains), LUC7 (red), 70K (green), and BBP (green, mammalian homologue of SF1) are modeled, as well as the mRNA (dotted black line).

**Figure S2: Microexon regulation by *Prpf40a* and *Srrm4*.** (A-B) Comparison of exon ΔPSIs upon *Prpf40a* KD when considering either all alternative exons (A) or only “highly alternatively spliced under control conditions” exons (B), as defined by exons that are between 30-70% spliced in control N2a cells. This is a control to address the alternative hypothesis that *Prpf40a* is simply required for alternatively-spliced exons, and microexons tend to be alternatively spliced. In contrast with this hypothesis, we find the same length-dependence when only considering alternatively-spliced exons. (C) Comparison of microexon ΔPSI for all microexons, and for only those that preserve frame (triplets), testing the hypothesis that the ΔPSIs might be under-reporting the true changes, if masked by NMD degradation of alternatively spliced products. (D) FPKM measurements for each of the three tested RNA binding proteins in control N2a cells, showing that each is expressed at substantial levels. (E) Reciprocal analysis of fold-changes between *Prpf40a* and *Prpf40b* to test whether they cross-regulate each other. No significant differences are observed. (F) RT-PCR quantification confirming that PRPF40B knockdown does not affect microexon splicing, nor does it exacerbate microexon dysregulation when knocked down in conjunction with PRPF40A. (G) FPKM values for *Luc7l* RNA levels, showing that *Prpf40a* results in ~2-fold increase in transcript abundance, nicely corresponding with the ~2-fold increase in productive isoform alternative splicing. (H) “Handedness score” as defined by 5’ splice site presence of conserved upstream exonic bases (-3 through -1) compared to presence of downstream intronic bases (+4 through +6) do not strongly predict sensitivity of microexons to *Prpf40a* knockdown.
